# Supplementary material for: Self-templated and self-assembled synthesis of nano/microstructures of Gd-based rare-earth compounds: morphology control, magnetic and luminescence properties
Source: Royal Society of Chemistry journal article supplement (doi:10.1039/c0cp00169d), 2010-01-01
Supplement: c0cp00169d.pdf [file c0cp00169d.pdf]

## **Electronic supplementary information**

### **Self-Templated and Self-Assembled Synthesis of Nano/ Microstructures of Gd-Based Rare-Earth Compounds: Morphology Control, Magnetic and Luminescence Properties**

**Zhenhe Xu, Chunxia Li\*, Dongmei Yang, Wenxin Wang, Xiaojiao Kang,  
Mengmeng Shang, and Jun Lin\***

*State Key Laboratory of Rare Earth Resources Utilization, Changchun Institute of Applied  
Chemistry, Chinese Academy of Sciences, Changchun 130022, and Graduate University of the  
Chinese Academy of Sciences, Beijing 100049, P. R. China*

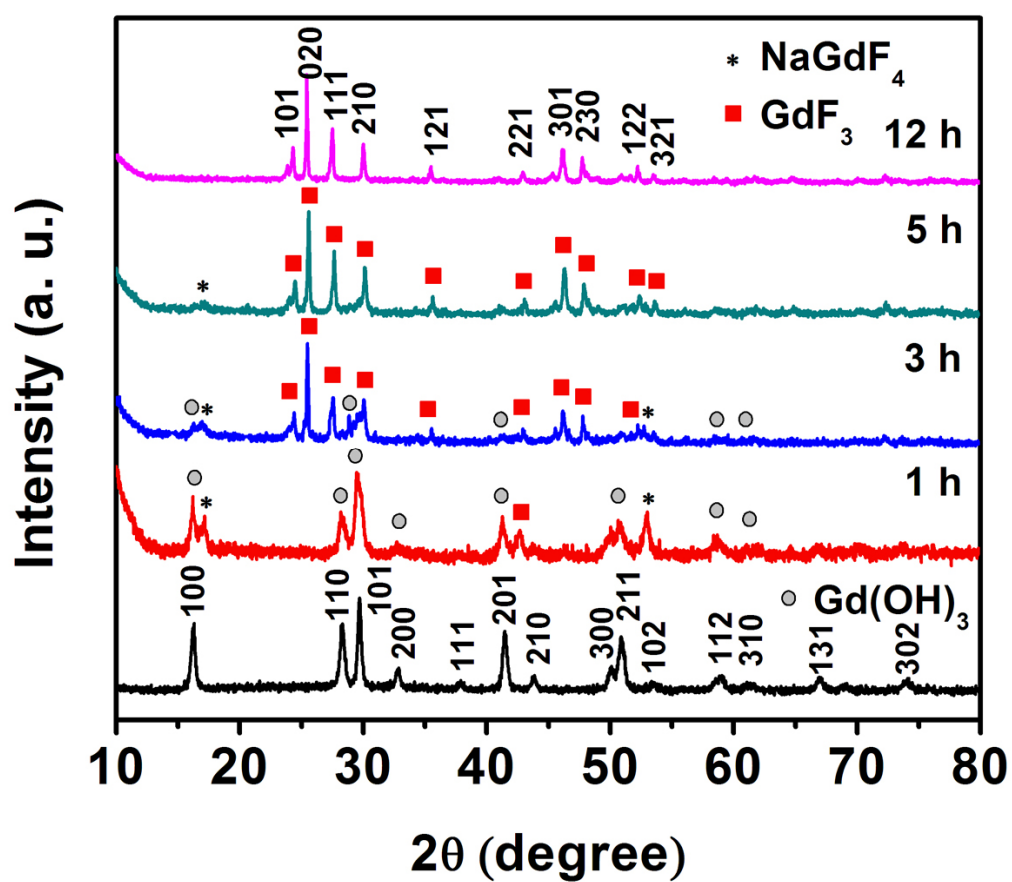

**Figure S1.** XRD patterns of evolution for GdF<sub>3</sub> nanorods with different reaction times.

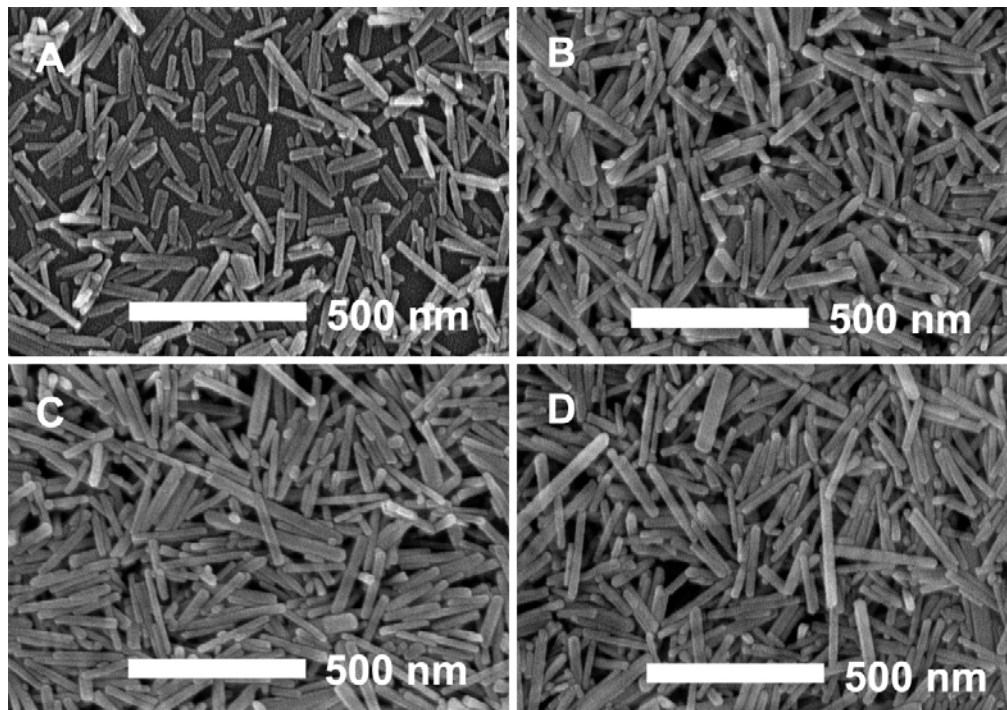

**Figure S2.** SEM images of evolution for  $\text{GdF}_3$  sample at different reaction times: (A) 1 h, (B) 3 h, (C) 5 h, (D) 12 h.

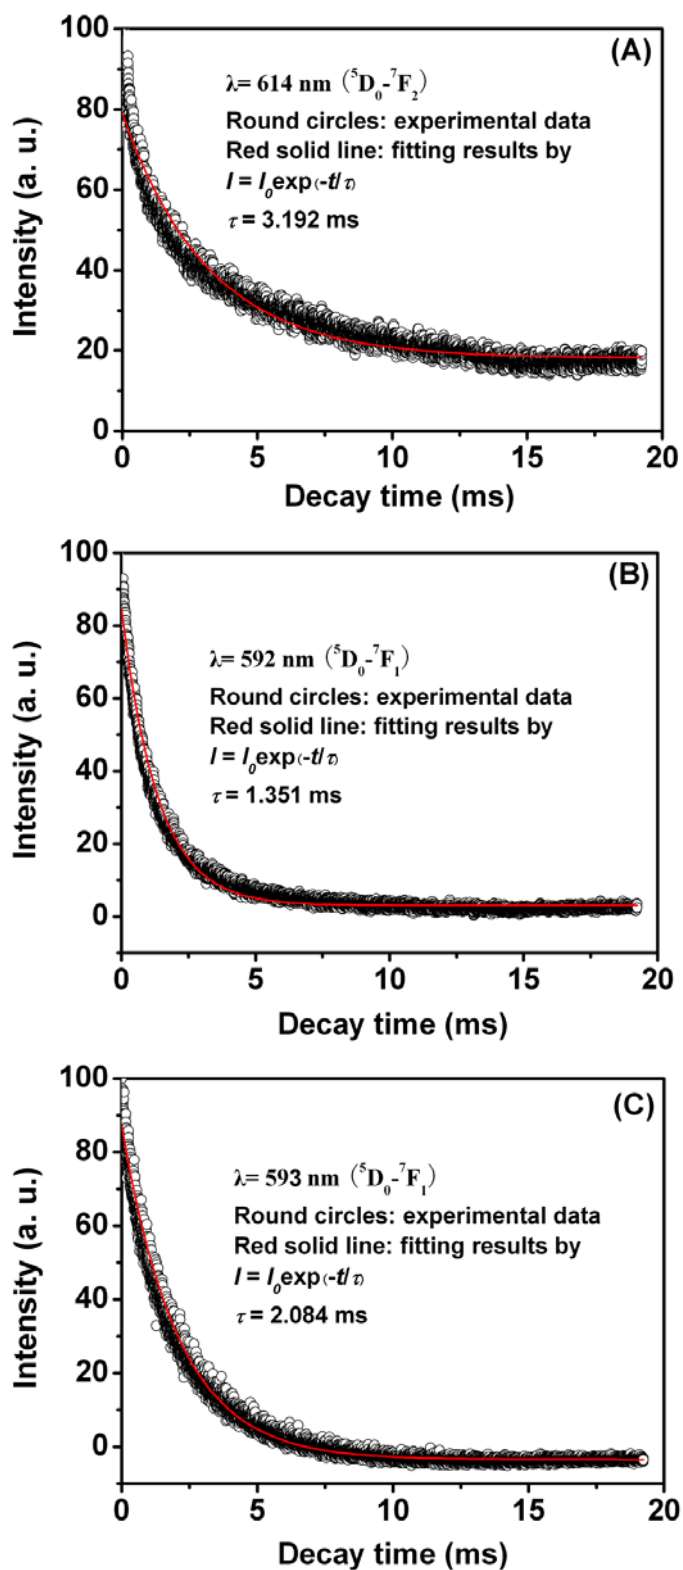

**Figure S3.** Decay curves for the as-prepared samples: (A) NaGdF<sub>4</sub>: 5 mol % Eu<sup>3+</sup>, (B) GdF<sub>3</sub>: 5 mol % Eu<sup>3+</sup>, and (C) GdBO<sub>3</sub>: 5 mol % Eu<sup>3+</sup>.
